# Supplementary material
Source: MDPI journal article supplement (https://www.mdpi.com/2073-4360/5/3/1102)
Supplement: s1 [file s1]

## Supplementary Data

**Figure S1.** Flow-cytometric analysis of PB<sub>46</sub>-PEO<sub>30</sub>/POPC vesicle samples. (a) PB-PEO/POPC (75:25); (b) PB-PEO/POPC (50:50); (c) PB-PEO/POPC (25:75). The preparations have been labeled with TMRho-PB-PEO and Pyrene-PE to confirm the presence of hybrid vesicles in the population; (d) Control PB-PEO sample (TMRho-labeled); (e) Control PB-PEO sample (pyrene-labeled); and (f) Control PB-PEO sample (unlabeled). The *x* and *y* axes of each dot plots represent the fluorescence intensity (units) for Pyrene and TMRho, respectively.

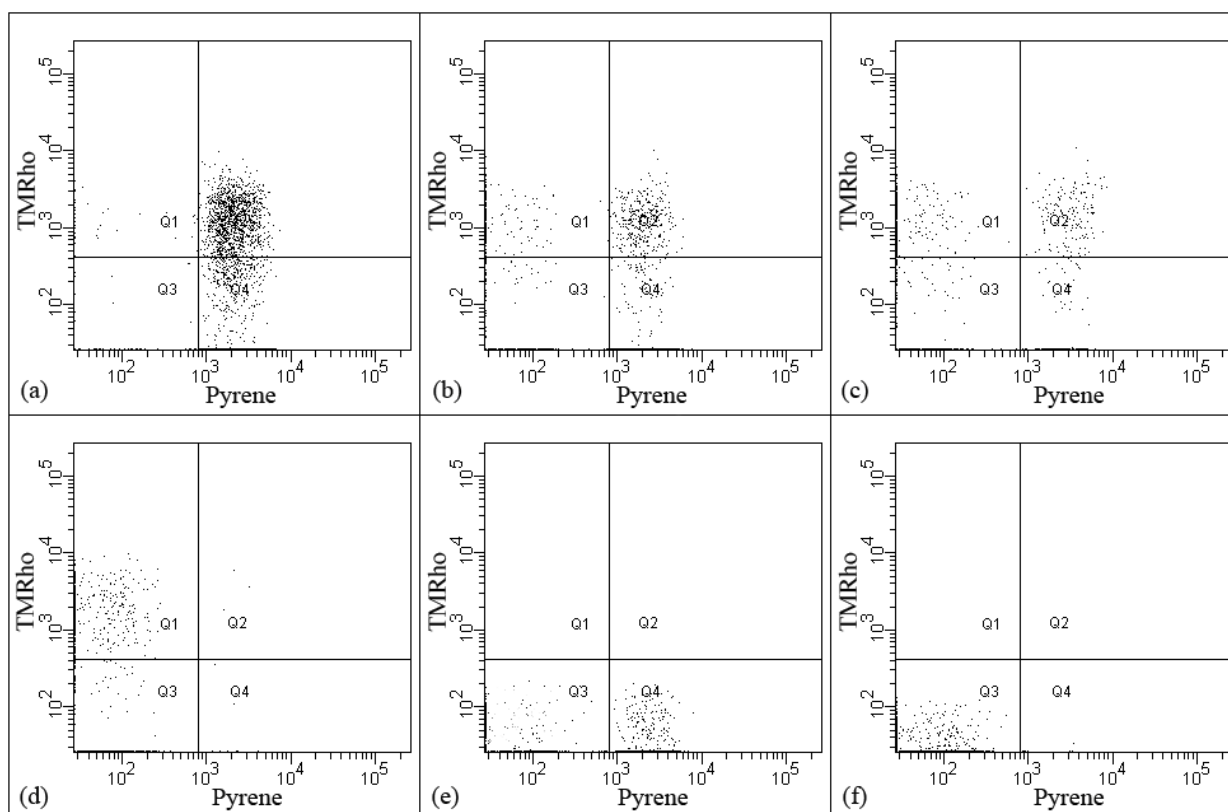

**Table S1.** Summary of flow-cytometric analysis of PB<sub>46</sub>-PEO<sub>30</sub>/POPC vesicle samples. PB-PEO/POPC (75:25); PB-PEO/POPC (50:50); and PB-PEO/POPC (25:75). Only few vesicles (<36% of vesicle population) contain both pyrene and TMRho, suggesting poor hybrid vesicle formation efficiency.

| Vesicles            | % of Pyrene and TMRho-labeled (hybrids) | % of Pyrene-labeled | % of TMRho-labeled |
|---------------------|-----------------------------------------|---------------------|--------------------|
| PB-PEO/POPC (25:75) | 17.1                                    | 15.6                | 23.9               |
| PB-PEO/POPC (50:50) | 23.1                                    | 13.1                | 37.4               |
| PB-PEO/POPC (75:25) | 36.0                                    | 60.6                | 2.1                |

**Figure S2.** Calculation of encapsulation volume vs. vesicles of different size.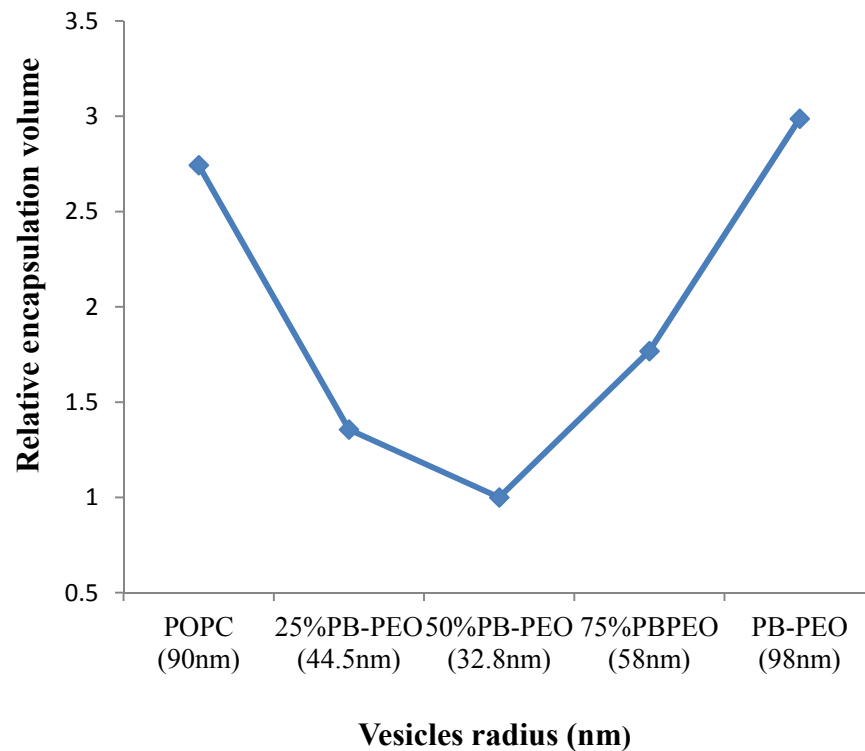

Note on calculation:

Surface area per vesicles ( $A$ ) =  $2 \times 4\pi R^2$ , where  $R$  is liposome radius;

Encapsulation volume per vesicles ( $V$ ) =  $(4/3)(\pi R^3)$

For equal number  $X$  of starting amphiphiles (molecular area =  $A_0$ ), total number of vesicles formed ( $N$ ) =  $A_0X/A = A_0X/(2 \times 4\pi R^2)$

$Total\ encapsulation\ volume = N \times V = (A_0X/8\pi R^2) \times (4/3)(\pi R^3) = 1/6 \times (A_0X \times R)$

$\propto R/6$  for equal number of amphiphiles.

Therefore, the theoretical encapsulation volume of vesicles is proportional to  $R/6$ . The calculated relative encapsulation volume of our vesicles was shown in Figure S2, assuming equal amphiphile number and molecular area and CF stock concentration.

© 2013 by the authors; licensee MDPI, Basel, Switzerland. This article is an open access article distributed under the terms and conditions of the Creative Commons Attribution license (<http://creativecommons.org/licenses/by/3.0/>).
